# Supplementary material for: Trace gas emissions from combustion of peat, crop residue, domestic biofuels, grasses, and other fuels: configuration and Fourier transform infrared (FTIR) component of the fourth Fire Lab at Missoula Experiment (FLAME-4)
Source: Copernicus journal article supplement (doi:10.5194/acp-14-9727-2014), 2014-09-16
Supplement: Supplementary file 1 [file acp-14-9727-2014-supplement.zip]

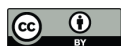

## *Supplement of*

# **Trace gas emissions from combustion of peat, crop residue, domestic biofuels, grasses, and other fuels: configuration and Fourier transform infrared (FTIR) component of the fourth Fire Lab at Missoula Experiment (FLAME-4)**

C. E. Stockwell et al.

*Correspondence to:* R. J. Yokelson ([bob.yokelson@umontana.edu](mailto:bob.yokelson@umontana.edu))

- Supplement-Cover-Letter.pdf
- acp-2014-239-sup.xlsx
