# Supplementary material for: Trace gas emissions from combustion of peat, crop residue, domestic biofuels, grasses, and other fuels: configuration and Fourier transform infrared (FTIR) component of the fourth Fire Lab at Missoula Experiment (FLAME-4)
Source: Copernicus journal article supplement (doi:10.5194/acp-14-9727-2014), 2014-09-16
Supplement: Supplementary file 1 [file acp-2014-239-sup.xlsx]

## Sheet: Table S1
Table S1. Estimate of carbon content of trash components burned during FLAME-4
Component	Category	Component weight (g)	Mass fraction	Estimated Carbon Fraction
manila packing paper	paper	82	0.208122	0.46
PVC pipe	plastic	38.6	0.0979695	0.74
Sunmaid raisins foil container	metal	6.4	0.0162437	-
banana peel	organic (food waste)	70	0.177665	0.38
soft black foam	plastic	2	0.00507614	0.74
plastic Coke bottle	plastic	26	0.0659898	0.74
coffee grounds, wet	organic	114	0.28934	0.38
styrofoam meal-to-go container	plastic	6	0.0152284	0.74
Kozy Shack pudding container	plastic	23	0.0583756	0.74
rubber trim	rubber	26	0.0659898	0.76
		394	1	0.502904
Component	Category	Component weight (g)	Mass fraction	Estimated Carbon Fraction
brown paper	paper	123	0.219643	0.46
added rubber	rubber	34	0.0607143	0.76
waxy coffee cups	-	28	0.05	-
styrofoam	plastic	10	0.0178571	0.74
assorted plastics	plastic	45	0.0803571	0.74
plastic grocery bags	plastic	17	0.0303571	0.74
pizza crusts	organic	62	0.110714	0.38
aluminum foil	metal	17	0.0303571	-
bleach bottle	plastic	93	0.166071	0.74
coffee grounds	organic	46	0.0821429	0.38
newspaper	paper	85	0.151786	0.46
		560	1	0.508321
*combined estimates from IPCC (2006) Table 2.4 and USEPA (2007) Annex 3 Tables A-125 to A-130

## Sheet: Table S2
Table S2. Spectral regions used to retrieve concentrations reported in this work.
Target Molecular species	HITRAN Species	PNNL species	Spectral Region (cm-1)
CO2, CO, H2O	H2O, CO2, CO, N2O	-	2050-2280
CH4	H2O, CH4	-	1291.69-1310
C2H2	H2O, CO2, C2H2	-	723-740
C2H4, NH3	H2O, CO2, NH3	C2H4	920-980
C3H6	H2O, CO2, NH3, C2H4	C3H6	900-925
CH3OH	H2O, CO2, NH3	CH3OH	990-1064
HCHO, HCl	H2O, CH4, HCl	HCHO	2730-2800
HCOOH	H2O, NH3, HCOOH	-	1098-1114
CH3COOH	H2O, NH3	CH3COOH	1176-1195
Fursn	H2O, CO2, C2H2	Furan	743.1-763.5
HCN	H2O, CO2, C2H2	HCN	710.2-717
NO	H2O, NO	-	1896.5-1903.2
NO2	H2O, NO2	-	1595-1599
HONO, glycolaldehyde	H2O, NH3	HONO, glycolaldehyde	822-877
SO2	SO2	-	2460-2530

## Sheet: Table S3
Table S3. Instrument list and measurement capabilities
FLAME-4 Trace gas Measurements
Instrument	Institution	Species Measured
OP-FTIR	University of Montana	CO2, CO, CH4, C2H2, C2H4, C3H6, H2O, HCHO, HCOOH, CH3OH, CH3COOH, glycolaldehyde, furan, NO, NO2, HONO, NH3, HCN, HCl, SO2
PTR-TOF-MS	University of Montana	High resolution m/z 18-300 VOC & I/SVOC
PTR-QMS	Carnegie Mellon University	Low resolution m/z 18-200 VOC & I/SVOC
Criteria gas monitors	Carnegie Mellon University	O3, NOx, CO2, SO2
THC	Max Planck Institute	Total hydrocarbons
WAS (GC-MS)	University of California, Irvine	CO2,CO, CH4, HC, OVOC, some SVOC, S and Cl- organics
WAS, Cartridges (GC-MS)	University of Miami	CO2,CO, CH4, HC, OVOC, some SVOC, S and Cl- organics
Cartridges (2D-GC/TOFMS)	Portland State University	VOC & I/SVOC
NOx isotope	Brown University	15N
FLAME-4 Particle Measurements
Instrument	Institution	Species Measured
HR-TOF-AMS	Carnegie Mellon University	OA,Cl-, SO2--, NH4+, NO3-
SP2	Carnegie Mellon University	BC: #, mass, size, coating
AET	Carnegie Mellon University	BC mass
SMPS	Carnegie Mellon University	Particle size 10-500 nm
LAAP-TOF	Carnegie Mellon University	Single particle composition 0.1-1 micron
CFDC	Colorado State University	Ice nuclei: #, size, composition
CCNC	Colorado State University	Cloud condensation nuclei
TEOM	Colorado State University	Particle mass
H-TDMA	Colorado State University	Aerosol hygroscopic growth factor
SP2	Colorado State University	BC: #, mass, size, coating
FMPS	Aecom Technology Corporation	Fast particle size distribution
PAX-870	Droplet Measurement Technologies	Paricle scattering and absorption at 870 nm
Filters (Teflon/ Quartz)	University of Iowa	PM2.5, EC/OC, IC, GC-MS, HP-PAED
MOUDI	Pacific Northwest National Laboratory	Nano-DESI-HR-MS analysis of high MW PM organics
PILS	Pacific Northwest National Laboratory	ESI-HR-MS analysis of high MW PM organics
SMPS	National Oceanic and Atmospheric Administration	Particle size 10-500 nm
BBCES	National Oceanic and Atmospheric Administration	Aerosol broadband UV extinction
NOAA PAS	University of Wyoming	Aerosol absorption at multiple wavelengths
PASS-3d	Los Alamos National Laboratory	Aerosol Babs and Bsca (405, 532, 781 nm)
PASS-UV	Los Alamos National Laboratory	Aerosol Babs and Bsca (375 nm)
SP2	Los Alamos National Laboratory	BC: #, mass, size, coating
TEM	Los Alamos National Laboratory	Grids for Electron Microscopy
SEM	Los Alamos National Laboratory	Grids for Electron Microscopy

## Sheet: Table S4
Table S4. Stack and room burn emission factors (g/kg dry fuel)
Configuration	stack	stack	stack	stack	stack	stack	stack	stack	stack	stack	stack	stack	stack	stack	stack	stack	stack	stack	stack	room		stack	stack	both	both		stack	stack	stack		stack	stack		stack	stack	stack	stack	stack	room	room	room	room	room	room	room		stack	stack	both
Fuel type	African Grass K1 (flat)	African Grass K1 (flat)	African Grass K1 (mixed upright and flat)	African Grass K1 (upright)	African Grass K1 (upright)	African Grass K1 (upright)	African Grass K2 (upright)	African Grass K3	African Grass K3 (Add to residue of burn 53)	African grass K3 (continued from Burn 40)	African Grass K3 (upright)	African Grass S1	African Grass S1	African Grass S1	African Grass S2	African Grass S2	African Grass S3 (feeding fire)	African Grass S3 (mixed upright and flat)	African Grass S3 (upright on residue of burn 58)	African Grass K3		African grass (19) stack burn avg	African grass (19) stack burn stdev	African grass (19,1) avg	African grass (19,1) stdev		Alfalfa Organic CO	Alfalfa Organic CO	Alfalfa Organic CO		Alfalfa Organic CO (3) Avg	Alfalfa Organic CO (3) stdev		Black Spruce AK	Black Spruce AK	Black Spruce AK	Black Spruce AK	Black Spruce AK	Black Spruce AK	Black Spruce AK	Black Spruce AK	Black Spruce AK	Black Spruce AK	Black Spruce AK	Black Spruce AK		Black Spruce AK(5) stack burn avg	Black Spruce AK(5) stack burn stdev	Black Spruce AK(5,7) avg
Fire #	48	49	50	46	47	52	42	53	54	41	40	82	83	91	81	92	57	58	59	145							36	65	66					39	51	74	77	126	131	134	137	155	156	157	158
MCE	0.97554	0.973361	0.974749	0.978906	0.98137	0.981555	0.984013	0.983189	0.98107	0.985354	0.981105	0.977828	0.97351	0.970458	0.969917	0.971671	0.980647	0.976253	0.979899	0.97451		0.977916	0.00468554	0.977745	0.00462371		0.914681	0.912323	0.927884		0.918296	0.00838674		0.959392	0.970227	0.951435	0.955903	0.951831	0.956862	0.95732	0.961734	0.936662	0.932935	0.935749	0.94088		0.957758	0.00769247	0.950911
Carbon Dioxide (CO2)	1562.53	1558.06	1559.79	1570.14	1575.05	1575.32	1570.43	1573.83	1570.85	1577.48	1570.12	1593.66	1583.94	1575.12	1542.68	1545.28	1581.28	1572.36	1580.41	1555.84		1570.44	12.4795	1569.71	12.5777		1354.33	1382.43	1409.95		1382.24	27.8105		1754.7	1784.15	1728.18	1746.88	1747.82	1753.13	1749.87	1763.81	1703.72	1694.24	1702.64	1714.15		1752.35	20.3187	1736.94
Carbon Monoxide (CO)	24.9315	27.1355	25.7132	21.5305	19.0276	18.8384	16.2363	17.1243	19.288	14.9213	19.2428	22.996	27.4279	30.5125	30.4487	28.6696	19.8587	24.3385	20.6304	25.8973		22.5722	4.79788	22.7385	4.72873		80.3907	84.5444	69.7345		78.2232	7.63916		47.2634	34.8407	56.1359	51.2823	56.2879	50.2957	49.646	44.6597	73.3132	77.5045	74.3961	68.5412		49.162	8.84044	57.0139
Methane (CH4)	0.461352	0.620758	0.605809	0.318932	0.229395	0.236804	0.177574	0.125872	0.102504	0.100645	0.177525	0.455353	0.630947	0.883797	0.63613	0.687626	0.344581	0.556142	0.310511	0.565467		0.403277	0.23257	0.411386	0.229254		7.65897	4.8646	3.62315		5.38224	2.06711		1.92112	1.06891	2.74487	1.98037	1.37463	2.48612	2.47658	2.11309	3.35489	3.51244	3.15615	2.85578		1.81798	0.643	2.42041
Water (H2O)	0.0767335	0.120691	0.0612557	0.052267	0.0695862	0.0613136	0.0601344	0.0673637	0.0666469	0.0638885	0.0628058	0.0670223	0.0497716	0.0729411	0.0703258	0.0609408	0.0970045	0.0597029	0.0709321	0.0963609		0.0690172	0.0160083	0.0703844	0.016738		0.0394324	0.0148791	0.0100522		0.0214546	0.0157552		0.134866	0.114055	0.0969006	0.140803	0.0185548	0.0200651	0.0653761	0.0519365	0.126905	0.100823	0.0829641	0.0620548		0.101036	0.0492839	0.0846087
Acetylene (C2H2)	0.0742162	0.0855651	0.0813617	0.0716725	0.0496201	0.0505064	0.041926	0.0307773	0.0271664	0.0298139	0.0490069	0.061313	0.076888	0.128202	0.0647453	0.107962	0.0549204	0.0690654	0.0576471	0.137247		0.0638092	0.0258586	0.0674811	0.0300521		0.400926	0.800165	0.691453		0.630848	0.206404		0.722541	0.365243	1.07196	0.833895	0.316904	0.472269	0.673863	0.515276	0.900524	1.10991	1.06461	0.968979		0.662109	0.319545	0.751331
Ethylene (C2H4)	0.251244	0.279111	0.337364	0.162489	0.120679	0.124112	0.101132	0.062264	0.0581599	0.059226	0.0899714	0.22541	0.317781	0.50978	0.261638	0.375195	0.160103	0.254355	0.157985	0.414109		0.205684	0.123079	0.216105	0.128542		2.13993	2.17739	2.23483		2.18405	0.0477993		2.01717	1.06101	3.00344	2.32527	1.0862	1.51533	2.13085	1.62899	3.16399	3.26109	3.07433	2.95124		1.89862	0.833416	2.26824
Propylene (C3H6)	0.0555018	0.0633252	0.0870461											0.127052	0.0835155	0.103044			0.0453397	0.100316		0.0806892	0.0285282	0.0831425	0.0273083		1.69979	1.01958	1.08396		1.26778	0.375517		0.55553	0.286167	0.842685	0.539512	0.405407	0.495999	0.57149	0.453463	0.737604	0.858719	0.772139	0.666489		0.52586	0.20821	0.598767
Methanol (CH3OH)	0.191786	0.256989	0.275228	0.0807835	0.0554262	0.0194807	0.0373468	0.0355082	0.0268894	0.0209571	0.0425692	0.151359	0.354895	0.435705	0.318059	0.25836	0.0658085	0.22071	0.0514421	0.14909		0.152595	0.132091	0.15242	0.12857		6.95028	1.69426	1.96529		3.53661	2.95943		0.821659	0.952251	1.45817	0.608471	0.728302	0.774829	1.03024	0.529931	1.36986	1.34755	1.04359	0.997645		0.913771	0.329372	0.971875
Formaldehyde (HCHO)	0.543299	0.567112	0.684955	0.388597	0.245313	0.255023	0.153536	0.132809	0.125897	0.0925274	0.164762	0.428935	0.696627	1.131	0.606759	0.704248	0.262921	0.536579	0.195846	0.285817		0.416671	0.2753	0.410128	0.269551		1.02446	0.954905	1.73797		1.23911	0.433422		1.47215	0.844874	2.17033	1.65766	1.19988	0.756176	1.04353	0.707424	1.52717	1.83177	1.58667	1.45224		1.46898	0.497349	1.35416
Furan (C4H4O)	0.078593	0.0846849	0.0932408		0.045766	0.0545498								0.124031	0.106555	0.101823	0.106306					0.0883944	0.0254874	0.0883944	0.0254874		0.360212	0.165066			0.262639	0.137989		0.0908264	0.100929	0.18961		0.194007	0.245179	0.163568	0.139507	0.153148	0.205423	0.171338	0.155668		0.143843	0.055568	0.164473
Nitrous Acid (HONO)	0.172136	0.1622	0.204375		0.137408	0.153857	0.11139	0.145117	0.163702	0.148149	0.140335	0.149571	0.199907	0.23652	0.200512	0.185109	0.219087	0.198637	0.131359	0.117253		0.169965	0.0339896	0.167191	0.035176		0.681355	0.25421			0.467782	0.302037		0.485611	0.511648	0.595618	0.546537	0.757247	0.229205	0.396968	0.307108	0.704038	0.617658	0.549824	0.520524		0.579332	0.107656	0.518499
Nitric Oxide (NO)	1.30381	1.09102	1.11642	1.39318	1.14876	1.16407	1.17907	1.28681	1.26989	1.14821	1.31256	1.68966	1.71806	1.65486	2.04021	1.96646	1.89994	1.80865	1.86375	1.23496		1.4766	0.329549	1.46452	0.325278		2.29025	2.41059	3.14433		2.61506	0.462297		2.14302	1.91746	1.68115	1.91093	2.57581	2.30985	2.07279	2.17669	1.58677	1.56144	1.62917	2.08769		2.04567	0.338376	1.97106
Nitrogen Dioxide (NO2)	1.22252	1.1568	0.995384	1.2075	0.978797	1.01605	0.858699	0.732565	0.81376	0.696713	1.08698	0.927102	1.05833	1.09947	1.24349	1.03104	0.639427	1.04032	0.984388	1.15227		0.988912	0.175121	0.99708	0.174321		1.1913	1.06408	1.76542		1.34027	0.373648		2.60288	1.83534	2.48766	2.67195	1.93088	1.78796	1.93601	1.87055	1.95019	1.79354	1.77225	2.03698		2.30574	0.39284	2.05635
Hydrogen Cyanide (HCN)	0.092823	0.117763	0.0844334									0.110885		0.155295	0.161418	0.16092	0.111967		0.115327	0.0525099		0.123426	0.028957	0.116334	0.0353305		1.53004	0.949018	0.688215		1.05576	0.430944		0.260683	0.127626	0.28931	0.283696	0.101461	0.168234	0.207083	0.177244	0.265877	0.303638	0.279497	0.253332		0.212555	0.0905863	0.226473
Acetic Acid (CH3COOH)	0.725547	0.859073	0.964163	0.256152				0.215408		0.197507	0.217151	0.574394	1.51444	1.65533	1.10739	0.763651	0.319387	0.828272	0.280346	0.219316		0.698547	0.4715	0.698547	0.4715		13.8342	2.12911	1.1102		5.69117	7.07045		1.5015	0.69023	2.95221	1.5076	1.23679	1.09096	1.50773	0.730477	1.87381	2.02055	1.67852	1.61199		1.57767	0.837231	1.57767
Formic Acid (HCOOH)	0.0651195	0.105364	0.0913368	0.0722363	0.0530508	0.0556535	0.0309737	0.0211723	0.0267396	0.0243712	0.058178	0.0435726	0.107578	0.200396	0.0687166	0.0781987	0.00926461	0.0631939	0.0604914	0.029152		0.065032	0.0426662	0.065032	0.0426662		0.263909	0.0235498			0.143729	0.16996		0.275873	0.151725	0.571694	0.341816	0.203104	0.129773	0.172145	0.0760709	0.258284	0.2953	0.266073	0.261277		0.308842	0.163655	0.308842
Glycolaldehyde (C2H4O2)														0.325068	0.0407494							0.182909	0.201044	0.182909	0.201044		0.0642814				0.0642814			0.319406	0.123444	0.669097	0.450064	0.282082	-0.0433299	0.0745135	0.00914558	0.17682	0.310448	0.254408	0.254681		0.368819	0.204292	0.368819
Hydrogen Chloride (HCl)	0.253299	0.266056	0.260948	0.324003	0.218374	0.220701	0.172054	0.334748	0.311006	0.373678	0.245605	0.196126	0.234259	0.192028	0.350293	0.276451	0.186081	0.263579	0.353126	0.0289825		0.264864	0.0614615	0.264864	0.0614615		0.0725643	0.0447476			0.0586559	0.0196694		0.0194793	0.0296715	0.074413	0.0884039	0.0355038	0.0263885	0.0235958	0.0166508		0.0304731	0.0232296	0.022456		0.0494943	0.0301018	0.0494943
Ammonia (NH3)	0.0745364	0.0780472	0.0562811	0.0641475	0.0390654	0.031491	0.0251037	0.0287972	0.0165979	0.0166458	0.00946145	0.120572	0.11917	0.271539	0.237606	0.273179	0.0535139	0.118196	0.0800774			0.090212	0.0835747	0.090212	0.0835747		9.46951	5.30736	5.09878		6.62522	2.46544		0.348764	0.341212	0.354788	0.265784	0.477886	0.215734	0.19012	0.172222	0.280649	0.298114	0.264139	0.212621		0.357687	0.0762453	0.357687
Sulfur dioxide (SO2)	0.512642	0.623732	0.735774	1.25266	0.710881	0.748623	0.757501	0.923118	1.096	0.786384	1.15564	0.95702	1.20226	0.926322	1.44571	1.52468		0.919802	1.23879	0.725427		0.973197	0.284498	0.973197	0.284498		1.65593	0.7405			1.19822	0.647307		0.954211	0.928756			1.15918		0.31676	0.449254	0.461811	0.281673	0.403222	0.419585		1.01405	0.12633	1.01405
a a statistically significant increase was not observed by OP-FTIR for any trace gases upon addition of small portions of meat
[truncated: 184 more columns]

## Sheet: Table S5
Table S5. Stack and room burn emission ratios to CO (mol/mol)
Configuration	stack	stack	stack	stack	stack	stack	stack	stack	stack	stack	stack	stack	stack	stack	stack	stack	stack	stack	stack	room		stack	stack	both	both		stack	stack	stack		stack	stack		stack	stack	stack	stack	stack	room	room	room	room	room	room	room		stack	stack	both
Fuel type	African Grass K1 (flat)	African Grass K1 (flat)	African Grass K1 (mixed upright and flat)	African Grass K1 (upright)	African Grass K1 (upright)	African Grass K1 (upright)	African Grass K2 (upright)	African Grass K3	African Grass K3 (Add to residue of burn 53)	African grass K3 (continued from Burn 40)	African Grass K3 (upright)	African Grass S1	African Grass S1	African Grass S1	African Grass S2	African Grass S2	African Grass S3 (feeding fire)	African Grass S3 (mixed upright and flat)	African Grass S3 (upright on residue of burn 58)	African Grass K3		African grass (19) stack burn avg	African grass (19) stack burn stdev	African grass (19,1) avg	African grass (19,1) stdev		Alfalfa Organic CO	Alfalfa Organic CO	Alfalfa Organic CO		Alfalfa Organic CO (3) Avg	Alfalfa Organic CO (3) stdev		Black Spruce AK	Black Spruce AK	Black Spruce AK	Black Spruce AK	Black Spruce AK	Black Spruce AK	Black Spruce AK	Black Spruce AK	Black Spruce AK	Black Spruce AK	Black Spruce AK	Black Spruce AK		Black Spruce AK(5) stack burn avg	Black Spruce AK(5) stack burn stdev	Black Spruce AK(5,7) avg
Fire #	48	49	50	46	47	52	42	53	54	41	40	82	83	91	81	92	57	58	59	145							36	65	66					39	51	74	77	126	131	134	137	155	156	157	158
Burn length (hr:min:s)	00:04:52	00:14:55	00:05:00	00:04:18	00:02:50	00:03:28	00:03:32	00:22:52	00:02:43	00:02:11	00:03:23	00:03:25	00:05:52	00:04:40	00:06:30	00:04:07	00:14:15	00:05:00	00:02:26	-							00:09:29	-	00:03:25					00:07:00	00:24:43	00:12:55	00:05:16	00:26:00	-	-	-	-	-	-	-
MCE	0.97554	0.973361	0.974749	0.978906	0.98137	0.981555	0.984013	0.983189	0.98107	0.985354	0.981105	0.977828	0.97351	0.970458	0.969917	0.971671	0.980647	0.976253	0.979899	0.97451		0.977916	0.00468554	0.977745	0.00462371		0.914681	0.912323	0.927884		0.918296	0.00838674		0.959392	0.970227	0.951435	0.955903	0.951831	0.956862	0.95732	0.961734	0.936662	0.932935	0.935749	0.94088		0.957758	0.00769247	0.950911
Carbon Dioxide (CO2)	39.8828	36.5386	38.6024	46.4078	52.6762	53.2147	61.5511	58.4859	51.8268	67.2765	51.924	44.101	36.7494	32.8505	32.2414	34.2997	50.6715	41.1114	48.7492	38.2311		46.2716	10.1052	45.8696	9.99869		10.7207	10.4055	12.8665		11.3309	1.33917		23.6256	32.5875	19.5909	21.6771	19.76	22.1814	22.4299	25.1329	14.7884	13.9109	14.5639	15.9148		23.4482	5.36602	20.5136
Carbon Monoxide (CO)	1	1	1	1	1	1	1	1	1	1	1	1	1	1	1	1	1	1	1	1		1	0	1	0		1	1	1		1	0		1	1	1	1	1	1	1	1	1	1	1	1		1	0	1
Methane (CH4)	0.0323834	0.0400333	0.0412303	0.0259228	0.0210978	0.021998	0.0191395	0.0128634	0.00930019	0.0118039	0.0161446	0.0346524	0.0402567	0.0506889	0.0365608	0.0419729	0.0303654	0.0399879	0.0263395	0.0382113		0.0290917	0.0120056	0.0295476	0.011862		0.166726	0.100693	0.0909236		0.119448	0.0412347		0.0711322	0.0536901	0.0855696	0.0675796	0.0427375	0.0865025	0.0872983	0.0828016	0.0800819	0.0793086	0.0742412	0.0729141		0.0641418	0.0164865	0.0736548
Water (H2O)	0.00478766	0.00691863	0.00370574	0.00377624	0.00568884	0.00506289	0.00576129	0.00611926	0.00537501	0.00666044	0.00507711	0.0045337	0.00282276	0.0037186	0.00359279	0.00330653	0.00759848	0.00381581	0.00534836	0.00578805		0.00493001	0.00132799	0.00497291	0.00130673		0.000763014	0.000273765	0.000224232		0.000420337	0.000297799		0.00443879	0.0050923	0.00268517	0.00427101	0.000512776	0.000620576	0.00204842	0.00180902	0.00269266	0.00202357	0.00173471	0.00140835		0.00340001	0.00184043	0.00244478
Acetylene (C2H2)	0.0032058	0.0033958	0.00340759	0.00358495	0.00280839	0.00288727	0.00278087	0.00193554	0.00151681	0.00215178	0.00274266	0.00287134	0.00301891	0.00452483	0.00228994	0.0040554	0.00297829	0.00305598	0.00300922	0.00570736		0.00295902	0.000701397	0.00309644	0.00091855		0.00537085	0.0101925	0.0106782		0.00874718	0.00293406		0.0164635	0.0112896	0.0205647	0.0175117	0.00606315	0.0101121	0.0146175	0.0124253	0.0132281	0.0154222	0.0154108	0.0152246		0.0143785	0.00572537	0.0140278
Ethylene (C2H4)	0.0100774	0.0102858	0.0131203	0.00754692	0.00634231	0.00658827	0.00622877	0.003636	0.00301535	0.00396924	0.00467558	0.00980213	0.011586	0.0167072	0.00859276	0.0130868	0.00806211	0.0104507	0.00765785	0.0159905		0.00849639	0.00361037	0.0088711	0.00389317		0.0266191	0.0257544	0.0320476		0.0281404	0.00341127		0.0426792	0.0304532	0.053503	0.0453424	0.0192971	0.0301284	0.0429208	0.0364756	0.0431571	0.0420761	0.0413238	0.0430578		0.038255	0.0134404	0.0392012
Propylene (C3H6)	0.00148412	0.00155578	0.00225684											0.00277595	0.00182855	0.00239612			0.00146514	0.0025824		0.00196607	0.000515728	0.00204311	0.000524844		0.014096	0.00803984	0.0103627		0.0108328	0.00305533		0.00783594	0.00547572	0.0100077	0.00701361	0.00480159	0.00657444	0.00767419	0.00676915	0.00670733	0.00738641	0.00691918	0.00648261		0.00702691	0.00205536	0.00697066
Methanol (CH3OH)	0.00673098	0.00828675	0.00936579	0.00328304	0.00254881	0.000904835	0.00201267	0.00181436	0.00121984	0.00122895	0.00193568	0.00575922	0.0113218	0.0124946	0.00914002	0.00788517	0.00289961	0.0079348	0.00218182	0.00503737		0.00520783	0.00378505	0.00519931	0.0036843		0.0756493	0.0175349	0.0246597		0.0392813	0.0316964		0.0152116	0.0239151	0.0227287	0.010382	0.0113215	0.0134798	0.0181578	0.0103827	0.0163494	0.0152134	0.012274	0.012736		0.0167118	0.00631393	0.0151793
Formaldehyde (HCHO)	0.0203389	0.0195059	0.0248623	0.0168454	0.012033	0.0126349	0.00882588	0.00723853	0.0060921	0.00578764	0.00799142	0.0174091	0.0237052	0.0345957	0.0185988	0.0229266	0.012357	0.0205767	0.00886018	0.0103008		0.0158519	0.00774211	0.0155743	0.00763716		0.011894	0.0105417	0.0232611		0.0152323	0.00698597		0.0290713	0.022633	0.0360846	0.0301692	0.0198958	0.0140323	0.019618	0.0147843	0.019442	0.0220587	0.0199055	0.0197753		0.0275708	0.00641824	0.0222892
Furan (C4H4O)	0.00129803	0.00128504	0.00149313		0.000990391	0.00119234								0.00167379	0.00144097	0.00146242	0.00220422					0.00144893	0.000344411	0.00144893	0.000344411		0.00184502	0.00080394			0.00132448	0.000736155		0.000791291	0.00119283	0.00139082		0.00141923	0.00200725	0.00135664	0.00128626	0.000860158	0.00109137	0.000948315	0.000935181		0.00119854	0.000289574	0.00120721
Nitrous Acid (HONO)	0.00411325	0.003561	0.00473511		0.00430217	0.00486556	0.00408714	0.00504853	0.00505625	0.00591499	0.00434467	0.00387484	0.00434204	0.00461795	0.00392312	0.00384651	0.00657242	0.00486213	0.00379325	0.0026973		0.00454783	0.000772328	0.00445043	0.000862315		0.00504926	0.0017913			0.00342028	0.00230373		0.00612102	0.00874872	0.00632103	0.00634909	0.00801462	0.00271489	0.00476355	0.00409671	0.00572103	0.00474768	0.00440285	0.00452427		0.0071109	0.00119198	0.00554379
Nitric Oxide (NO)	0.0488092	0.037526	0.0405237	0.0603935	0.0563482	0.0576732	0.0677777	0.0701354	0.0614493	0.0718215	0.0636628	0.068578	0.0584632	0.0506196	0.0625379	0.0640177	0.089295	0.0693582	0.0843173	0.0445078		0.0622793	0.0128494	0.0613908	0.0131229		0.0265898	0.0266119	0.042084		0.0317619	0.00893921		0.0423193	0.051366	0.0279514	0.0347787	0.0427106	0.0428638	0.038968	0.04549	0.0202008	0.0188033	0.0204387	0.0284283		0.0398252	0.00886271	0.0345266
Nitrogen Dioxide (NO2)	0.0298475	0.025949	0.0235632	0.0341376	0.0313118	0.0328301	0.0321924	0.0260396	0.0256809	0.0284216	0.0343836	0.02454	0.023487	0.0219334	0.0248584	0.0218905	0.0195993	0.0260178	0.0290441	0.0270833		0.0271436	0.00437792	0.0271406	0.00426118		0.00902016	0.00766106	0.0154099		0.010697	0.00413764		0.0335219	0.032065	0.0269744	0.0317147	0.0208805	0.0216384	0.0237369	0.0254949	0.0161918	0.0140859	0.0145002	0.0180899		0.0290313	0.00517774	0.0232412
Hydrogen Cyanide (HCN)	0.00386102	0.00450053	0.00340527									0.0050005		0.00527804	0.00549765	0.0058208	0.00584703		0.00579719	0.00210272		0.00500089	0.000897326	0.00471108	0.00124726		0.0197374	0.0116408	0.0102346		0.0138709	0.00512893		0.00571981	0.0037988	0.00534462	0.00573692	0.0018693	0.00346878	0.00432567	0.00411577	0.0037609	0.00406278	0.00389602	0.00383294		0.00449389	0.00166908	0.00416103
Acetic Acid (CH3COOH)	0.0135808	0.014774	0.0174985	0.00555201				0.00587023		0.0061771	0.00526623	0.0116564	0.0257672	0.0253171	0.0169722	0.0124302	0.00750539	0.0158813	0.00634152	0.00395205		0.012706	0.00681669	0.012706	0.00681669		0.0803074	0.0117522	0.00742954		0.033163	0.0408854		0.0148254	0.00924515	0.0245422	0.013719	0.0102539	0.0101224	0.0141725	0.00763303	0.0119275	0.0121661	0.0105289	0.0109753		0.0145171	0.00606636	0.0145171
Formic Acid (HCOOH)	0.00158988	0.0023635	0.00216217	0.00204222	0.0016971	0.00179824	0.0011612	0.000752584	0.000843856	0.000994195	0.00184031	0.00115335	0.00238743	0.00399771	0.0013737	0.00166027	0.000283973	0.00158045	0.00178479	0.000685195		0.00165615	0.00079514	0.00165615	0.00079514		0.00199824	0.000169552			0.0010839	0.00129308		0.00355291	0.00265076	0.00619903	0.00405718	0.00219637	0.00157055	0.00211062	0.00103682	0.00214445	0.0023192	0.00217697	0.00232033		0.00373125	0.00156135	0.00373125
Glycolaldehyde (C2H4O2)														0.00497168	0.000624539							0.00279811	0.00307389	0.00279811	0.00307389		0.000373153				0.000373153			0.00315373	0.00165345	0.00556231	0.00409556	0.00233866	-0.000402035	0.000700418	9.55657e-05	0.00112552	0.00186925	0.00159583	0.00173401		0.00336074	0.00153209	0.00336074
Hydrogen Chloride (HCl)	0.00780238	0.00752966	0.00779359	0.0115568	0.00881367	0.0089971	0.00813802	0.0150123	0.0123829	0.0192324	0.00980187	0.00654974	0.0065591	0.00483313	0.00883495	0.00740522	0.00719602	0.00831681	0.0131451	0.000859456		0.00946846	0.00344748	0.00946846	0.00344748		0.0006932	0.000406468			0.000549834	0.00020275		0.000316512	0.000654025	0.00101801	0.00132387	0.000484396	0.000402925	0.000364998	0.000286326		0.000301947	0.000239791	0.000251607		0.000759363	0.000408775	0.000759363
Ammonia (NH3)	0.00492414	0.00473727	0.00360508	0.00490721	0.00338155	0.00275329	0.00254659	0.00276979	0.00141734	0.00183742	0.000809837	0.00863583	0.00715619	0.0146576	0.0128528	0.015694	0.00443839	0.00799866	0.00639309			0.00586927	0.00437887	0.00586927	0.00437887		0.194013	0.103396	0.120428		0.139279	0.0481599		0.0121539	0.0161305	0.0104097	0.00853632	0.0139836	0.00706476	0.00630743	0.00635159	0.00630508	0.00633526	0.00584779	0.00510933		0.0122428	0.00296862	0.0122428
Sulfur dioxide (SO2)	0.0089959	0.0100563	0.0125189	0.025454	0.0163452	0.0173859	0.0204114	0.0235843	0.0248601	0.0230572	0.0262743	0.0182073	0.0191771	0.0132819	0.0207726	0.0232667		0.016534	0.0262705	0.0122551		0.0192474	0.00549144	0.0192474	0.00549144		0.00901188	0.00383194			0.00642191	0.00366277		0.00883278	0.0116625			0.0090098		0.00279141	0.00440102	0.00275588	0.00159	0.00237122	0.00267822		0.00983503	0.00158511	0.00983503
[truncated: 184 more columns]

## Sheet: Table S6
Table S6. Emission factors (g/kg dry fuel) for previously published garbage burns and current FLAME-4 burns
	Trash Burning
Species	EF Christian et al. [2010]				EF Yokelson et al. [2011]	EF Yokelson et al. [2013]	EF FLAME-4
	ground				airborne	laboratory	laboratory
MCE	0.964	0.911	0.958	0.968	0.974	0.967407	0.968752	0.977465
Carbon Dioxide (CO2)	1404	1270	1385	1409	1538	1340.85	1773.32	1812.98
Carbon Monoxide (CO)	33.8	79.1	38.7	29.6	26.09	28.7472	36.3996	26.5984
Methane (CH4)	1.16	10.3	2.18	1.14	0.766	0.313099	0.943131	0.658729
Ethylene (C2H4)	0.82	4.75	2.2	0.99	0.322	1.74472	1.0197	0.948422
Acetylene (C2H2)	0.14	0.72	0.53	0.2	bdl	0.435473	0.401614	0.253568
Propylene (C3H6)	0.36	3.34	0.97	0.36	bdl	0.846872	0.676171	0.609338
Formaldehyde (HCHO)	0.56	0.48	0.68	0.76	bdl	0.757273	1.25637	0.587551
Methanol (CH3OH)	0.31	2.81	0.4	0.26	bdl	0.135372	0.226193	0.110969
Acetic Acid (CH3COOH)	0.58	7.4	0.92	0.78	bdl	0.546732	bdl	bdl
Formic Acid (HCOOH)	0.05	0.14	0.34	0.19	bdl	0.175001	0.0226393	0.0668338
Glycolaldehyde (C2H4O2)	nm	nm	nm	nm	nm	nm	1.24673	0.0806925
Furan (C4H4O)	nm	nm	nm	nm	nm	0.0480952	bdl	0.0837802
Nitric Oxide (NO)	bdl	bdl	bdl	bdl	bdl	0.420897	0.462018	0.581049
Nitrogen Dioxide (NO2)	bdl	bdl	bdl	bdl	6.865	0.695483	0.49371	1.05116
Nitrogen Oxides (NOx as NO)	bdl	bdl	bdl	bdl	4.477	0.728074	0.623301	1.06448
Ammonia (NH3)	0.46	2.52	0.39	bdl	0.768	bdl	bdl	0.0624787
Hydrogen Cyanide (HCN)	bdl	bdl	bdl	bdl	0.473	0.119183	0.0985976	0.00819588
Nitrous Acid (HONO)	nm	nm	nm	nm	nm	0.0514256	0.329984	0.153237
Hydrogen chloride (HCl)	1.65	bdl	9.8	3.02	bdl	10.0745	1.51673	0.0902625
Sulfur Dioxide (SO2)	nm	nm	nm	nm	nm	0.768567	bdl	0.897044
Note: "nm" indicates not measured, "bdl" indicates mixing ratio was below detection limit
